# Supplementary material for: Wildlife overpass structure size, distribution, effectiveness, and adherence to expert design recommendations
Source: PeerJ journal article supplement (doi:10.7717/peerj.14371), 2022-12-12

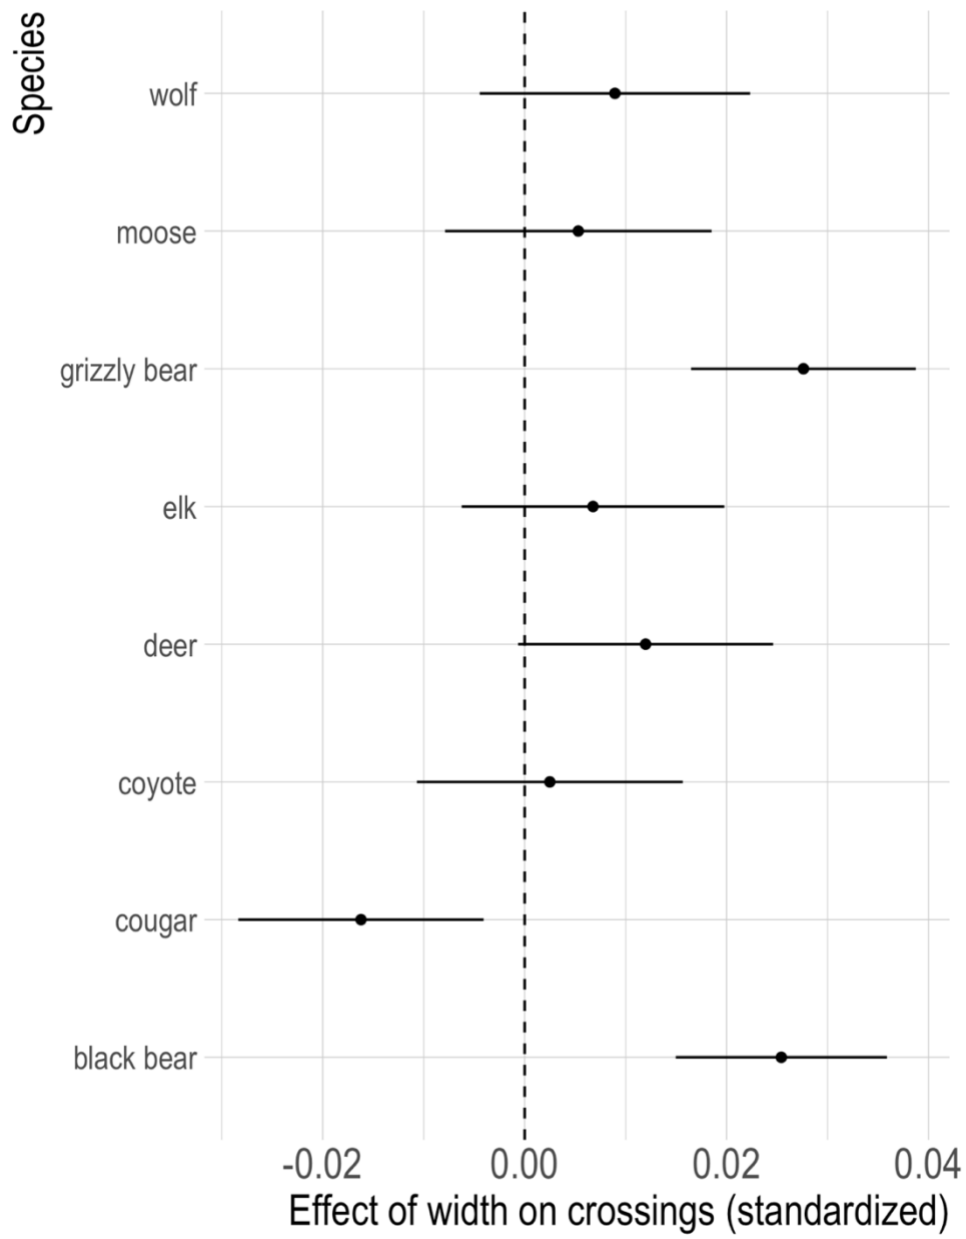

Supplement: Supplementary_Figure_S2.pdf [file Supplementary_Figure_S2.pdf]
